# Supplementary material
Source: publisher figshare collection journal article supplement (https://acs.figshare.com/ndownloader/files/4705585)
Supplement: Supplementary file 1 [file 4705585]

# SUPPORTING INFORMATION

## Cytochrome c and Organic Molecules: the Solution

### Structure of the Para-Aminophenol Adduct<sup>†</sup>

*Michael Assfalg, Ivano Bertini, Rebecca Del Conte, Andrea Giachetti, Paola Turano*

**Table S1.** Acquisition parameters for the NMR experiments

| Experiments                             | Dimension of acquired data (nucleus) |                       |                      | Spectral width (ppm) |      |      | Ref |
|-----------------------------------------|--------------------------------------|-----------------------|----------------------|----------------------|------|------|-----|
|                                         | t1                                   | t2                    | t3                   | F1                   | F2   | F3   |     |
| Water-LOGSY <sup>a</sup>                | 16384( <sup>1</sup> H)               | -                     | -                    | 9.7                  | -    | -    | (1) |
| <sup>15</sup> N-HSQC <sup>b</sup>       | 1024( <sup>1</sup> H)                | 128( <sup>15</sup> N) | -                    | 15.0                 | 40.0 | -    | (2) |
| <sup>15</sup> N-NOESY-HSQC <sup>c</sup> | 1024( <sup>1</sup> H)                | 40( <sup>15</sup> N)  | 256( <sup>1</sup> H) | 20.0                 | 40.0 | 20.0 | (3) |

<sup>a</sup> Data acquired on a Bruker Avance 700 spectrometer equipped with a sample changer

<sup>b</sup> Data acquired on a Bruker Avance 900 and 800 spectrometers both equipped with a cryoprobe

<sup>c</sup> Data acquired on a Bruker Avance 800 spectrometer equipped with a cryoprobe

**Table S2.** Statistical analysis of the energy-minimized family of conformers and the mean structure of *S. cerevisiae* iso-1-cytochrome *c*

|                                                                            | REM <sup>a</sup> (35 structures) | <REM> <sup>a</sup> (mean) |
|----------------------------------------------------------------------------|----------------------------------|---------------------------|
| RMS violations per meaningful distance restraint (Å) <sup>b</sup>          |                                  |                           |
| intraresidue (438)                                                         | 0.0099 ± 0.0016                  | 0.0076                    |
| sequential (389)                                                           | 0.0114 ± 0.0017                  | 0.0093                    |
| medium-range (369) <sup>c</sup>                                            | 0.0068 ± 0.0017                  | 0.0050                    |
| long-range (474)                                                           | 0.0049 ± 0.0016                  | 0.0056                    |
| total (1670)                                                               | 0.0086 ± 0.0010                  | 0.0070                    |
| RMS violations per meaningful dihedral angle restraints (deg) <sup>b</sup> |                                  |                           |
| ϕ (49)                                                                     | 0.00 ± 0.00                      | 0.86                      |
| ψ (49)                                                                     | 0.00 ± 0.00                      | 1.90                      |
| average number of restraints per residue                                   | 15                               | 15                        |
| average number of violations per structure                                 |                                  |                           |
| intraresidue (438)                                                         | 7.5143 ± 1.4613                  | 6                         |
| sequential (389)                                                           | 8.2000 ± 1.9094                  | 7                         |
| medium-range (369) <sup>c</sup>                                            | 4.1429 ± 1.6413                  | 3                         |
| long-range (474)                                                           | 3.1429 ± 1.6758                  | 5                         |
| total (1670)                                                               | 23.000 ± 3.7264                  | 21                        |
| ϕ (49)                                                                     | 8.9714 ± 3.0283                  | 12                        |
| ψ (49)                                                                     | 3.7714 ± 1.3541                  | 4                         |
| average number of NOE violations larger than 0.3 Å                         | 0.00 ± 0.00                      | 0.00                      |

|                                                           | REM <sup>a</sup> (35 structures) | <REM> <sup>a</sup> (mean) |
|-----------------------------------------------------------|----------------------------------|---------------------------|
| average number of NOE violations<br>between 0.1 and 0.3 Å | 2.3 ± 1.5                        | 1                         |
| Average distance penalty function (kcal/mol)              | 8.145 ± 1.3                      | 5.968                     |
| structural analysis <sup>d</sup>                          |                                  |                           |
| % of residues in most favorable regions                   | 73.7                             | 72.2                      |
| % of residues in allowed regions                          | 23.5                             | 25.6                      |
| % of residues in generously allowed regions               | 2.2                              | 2.2                       |
| % of residues in disallowed regions                       | 0.5                              | 0.0                       |

<sup>a</sup> REM indicates the energy-minimized family of 35 structures, and <REM> is the energy-minimized mean structure obtained from the coordinates of the individual REM structures.

<sup>b</sup> The number of meaningful restraints for each class is reported in parentheses.

<sup>c</sup> Medium-range distance restraints are those between residues *i* and *i* + 2, *i* and *i* + 3, *i* and *i* + 4, and *i* and *i* + 5.

<sup>d</sup> As it results from the Ramachandran plot analysis.

**Table S3.** Number of intramolecular NOEs involving the side chains of residues in the p-aminophenol binding site, detected in the  $^{15}\text{N}$ -NOESY-HSQC maps of bound and unbound cytochrome c. For unbound cytochrome c the total number of intramolecular NOEs involving the side chains of the same residues detected in all the NOESY maps acquired is provided in paranthesis.

| Residue | unbound cyt c<br># of intramolecular NOEs | bound cyt c<br># of intramolecular NOEs |
|---------|-------------------------------------------|-----------------------------------------|
| Glu61   | 5 (17)                                    | 5                                       |
| Asn62   | 6 (6)                                     | 6                                       |
| Asn63   | 27 (12)                                   | 12                                      |
| Lys99   | 11 (9)                                    | 9                                       |

**Fig. S1** Residues on cytochrome c surface experiencing CSP upon binding of molecules 2 (up), and 3 (down) are highlighted in grey. The plots of the observed CSP, extrapolated to 100% bound, as a function of the residue number are also reported.

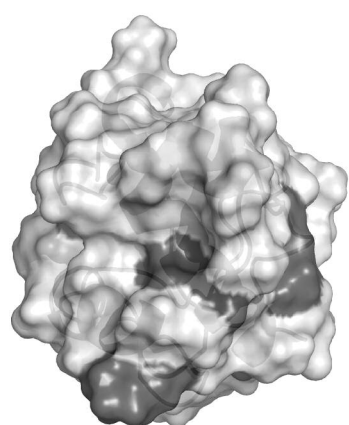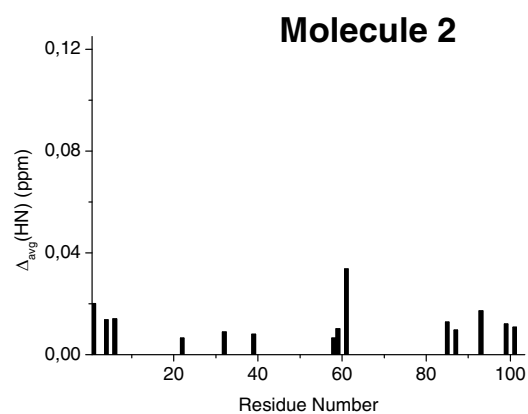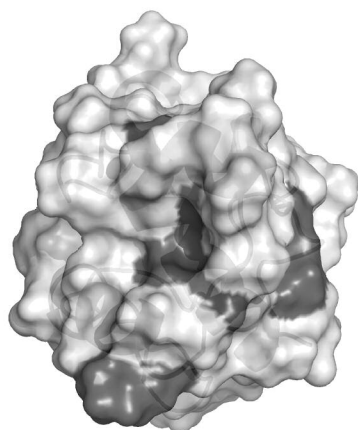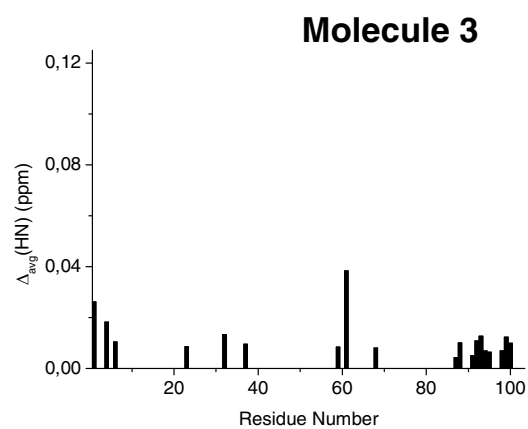

## REFERENCES

1. Dalvit, C., Fogliatto, G., Stewart, A., Veronesi, M., and Stockman, B. J. (2001) WaterLOGSY as a method for primary NMR screening: practical aspects and range of applicability, *J. Biomol. NMR* 21, 349-359.
2. Sklenar, V., Piotto, M., Leppik, R., and Saudek, V. (1993) Gradient-tailored water suppression for  $^1\text{H}$ - $^{15}\text{N}$  HSQC experiments optimized to retain full sensitivity, *J. Magn. Reson. Ser. A* 102, 241-245.
3. Wider, G., Neri, D., Otting, G., and Wüthrich, K. (1989) A Heteronuclear Three-Dimensional NMR Experiment for Measurements of Small Heteronuclear Coupling Constants in Biological Macromolecules, *J. Magn. Reson.* 85, 426-431.
